# Supplementary material for: AAV-Mediated Targeting of the Activin A-ACVR1R206H Signaling in Fibrodysplasia Ossificans Progressiva
Source: MDPI journal article supplement (doi:10.3390/biom13091364), 2023-09-08
Supplement: s1 [file s1]

# AAV-Mediated Targeting of the Activin A-ACVR1<sup>R206H</sup> Signaling in Fibrodysplasia Ossificans Progressiva

Yeon-Suk Yang <sup>1,†</sup>, Chujiao Lin <sup>1,†</sup>, Hong Ma <sup>2,3,4</sup>, Jun Xie <sup>2,3,4</sup>, Frederick S. Kaplan <sup>5,6,7</sup>, Guangping Gao <sup>2,3,4,8,\*</sup> and Jae-Hyuck Shim <sup>1,2,8,\*</sup>

<sup>1</sup> Department of Medicine, Division of Rheumatology, University of Massachusetts Chan Medical School, Worcester, MA 01655, USA; yen.yang@umassmed.edu (Y.-S.Y.), chujiao.lin@umassmed.edu (C.L.)

<sup>2</sup> Horae Gene Therapy Center, University of Massachusetts Chan Medical School, Worcester, MA 01655, USA; hong.ma2@umassmed.edu (H.M.), jun.xie@umassmed.edu (J.X.)

<sup>3</sup> Department of Microbiology and Physiological Systems, University of Massachusetts Chan Medical School, Worcester, MA 01655, USA

<sup>4</sup> Viral Vector Core, University of Massachusetts Chan Medical School, Worcester, MA 01655, USA

<sup>5</sup> Department of Orthopaedic Surgery, The Perelman School of Medicine at the University of Pennsylvania, Philadelphia, PA 19104, USA; frederick.kaplan@pennmedicine.upenn.edu

<sup>6</sup> Department of Medicine, The Perelman School of Medicine at the University of Pennsylvania, Philadelphia, PA 19104, USA

<sup>7</sup> The Center for Research in FOP and Related Disorders, The Perelman School of Medicine at the University of Pennsylvania, Philadelphia, PA 19104, USA

<sup>8</sup> Li Weibo Institute for Rare Diseases Research, University of Massachusetts Chan Medical School, Worcester, MA 01655, USA

\* Correspondence: guangping.gao@umassmed.edu (G.G.); jaehyuck.shim@umassmed.edu (J.-H.S.).

† These authors contributed equally to this work.

## Supplementary information

- Supplementary Figures S1-S4
- Supplementary Table S1

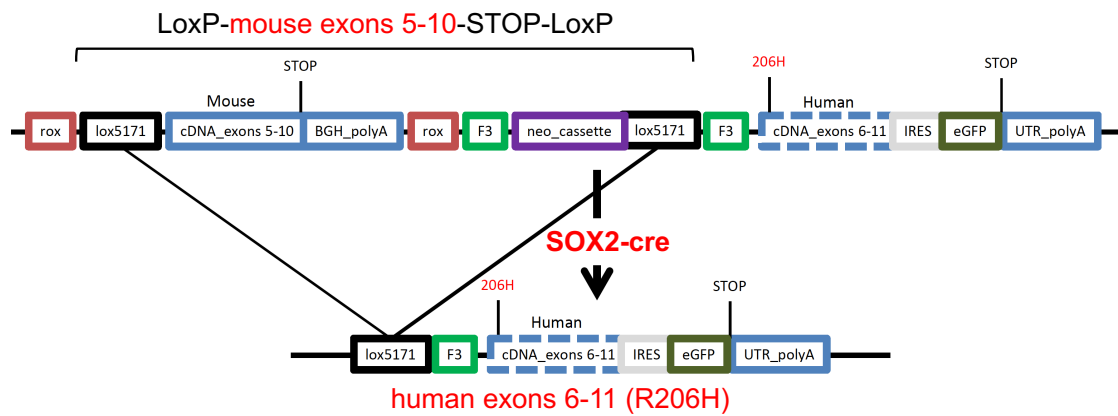

Supplementary Figure S1. Diagram showing the targeting construct to generate mice harboring a conditional knock-in allele of human *Acvr1*<sup>R206H</sup> (*Acvr1*<sup>R206H/+</sup>)

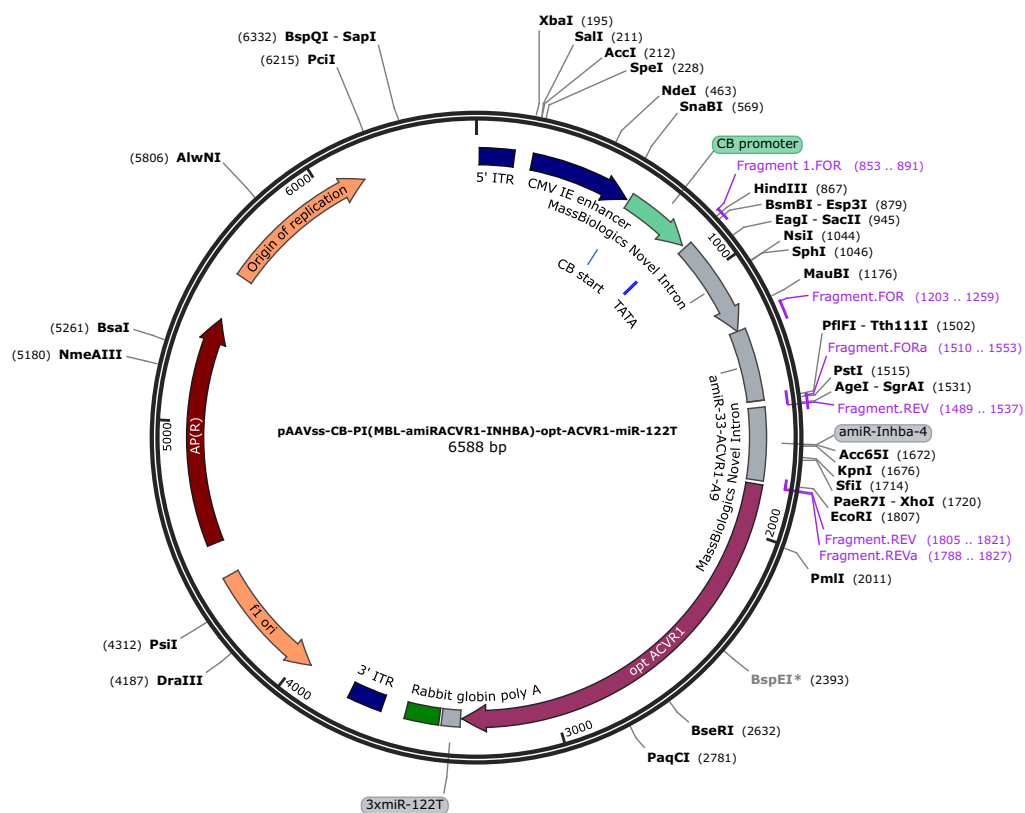

## Supplementary Figure S2. Construction of AAV vector genome.

AAV vector genomes containing CBA (CMV enhancer/chicken  $\beta$ -actin) promoter, MBL intron (MassBiologics), amiR-ACVR1<sup>R206H</sup>, amiR-Inhba #4, ACVR1<sup>opt</sup>, three tandem miR-122-TS (target sequence), and poly A sequences.

## Supplementary Table S1: Sequences of primers and gblocks

### 1. Codon-optimized ACVR1 (ACVR1<sup>opt</sup>)

atggctgatggagtgatgatcctgctgtcctgattatgattgcctgcccagccccagcatggaagatgaaaaacctaagtaaccctaagctgtatatg  
tgcgtgtgtagggcctgagctgcggaaacgaggatcactgcgagggccagcagtgttcagctccctgtccatcaatgacggctccacgtgtaccaga  
agggctgtcttcagggtgatgagcagggcaagatgacctgtaagacaccaccttcccaggacagggcagtgagtgctgtcagggcgattgggtgaacc  
ggaatatcaccgcccagctgccaacaagggaagcttccccggcacacagaactttcacctggaagtgggcctgatcatcctgagcgtgggttccg  
gtgtgctgctggcatgtctgctgggagtgccctgagaagtttaagcggagaaaccaggagcggctgaatccaagagatgtggagtacggcaccat  
cgagggcctgatcaccacaaatgtgggcgactctacactggccgacctgctggatcacagctgcaccagcggctccggatctggcctgccctttctgggtgc  
agaggaccgtggcccgagatcacctgctggagtgcgtgggcaaggccgggtacggagagaagtgtggagaggatcctggcagggagagaactgtg  
gcagtgaagatcttcttagccgggatgagaagtcttggttagagagacagagctgtataacacagtgtatgtgaggcacgagaatatcctgggcttca  
tcgctccgacatgacctctgccactctctacacagctgtggctgatcaccactaccagagatgggctccctgtacgattacctccagctgaccacact  
ggacacagtgtcttgctgcggatcgtgtctatcgccagcggcctggcacacctgcacatcgagatcttgaacccagggaagccagcaatcgca  
cacagagatctgaagtctaagaacatcctgggtgaagaagaatggccagtgtgtatcgccgatctggcctggccgtgatgcacagccagtcaccaac  
cagctggagctgggcaacaatctcgggtgggcacaaagagatacatggccccagaggtgctggatgagacaatccaggtggactgcttcgatagcta  
taagagggtggacatctgggcttggcctgggtgctgtgggaggtggcaaggaggatggtagaacggcatcgtggaggactacaagccaccttct  
atgacgtggctctaataatgatcatcttggagacatgcgaagggtgggtgctgtggatcagcagaggcccaacatccctaactcgtgttcagcgacccc  
acctgacatccctggccaagctgatgaaggagtgttggtatcagaatcctagcgccagggtgaccgacctgcgcatcaagaaaactctgactaaatcg  
acaatagcctggataaactgaaaaccgactgctga

### 2. amiR-ACVR1<sup>R206H</sup>

agggctctgcgtttgctccaggtagtcgctgctccctgggcctgggcccactgacagccctgggtgccttgccggctgcacacctctggcgggcagc  
tgtgtgaatctggtgagccactgtgttctggaatacctgacagtggcagatcagattacacacggaggcctgacctgactgccacgggtccgtggcc  
aaaggagatctaagggcaccgctgagggcctacctaaccatcgtggggaataaggacagtgtcaccc

### 3. amiR-INHBA #1

ggcagccttgagtggttctgccccctgggcacacaaacagagctgaagaccacctgggcacctccttggtggcgcataacctctggcgggca  
gctgtgtcttcttcttcttctgccccctgttctggtggtaccagggcaagatcaggaaagaaacacagaggcctgacctggccctcgagagactgcctga  
ctgaaggccctatcaggtgggggaggggatcctgatagagggcactgctgccactgttggggcccaag

### 4. amiR-INHBA #2

ggcagccttgagtggttctgccccctgggcacacaaacagagctgaagaccacctgggcacctccttggtggcgcataacctctggcgggca  
gctgtgtttgacctgttctctggtatgttctggtggtaccatccagagatcatagtggcaaacacagaggcctgacctggccctcgagagactgcctga  
ctgaaggccctatcaggtgggggaggggatcctgatagagggcactgctgccactgttggggcccaag

### 5. amiR-INHBA #3

ggcagccttgagtggttctgccccctgggcacacaaacagagctgaagaccacctgggcacctccttggtggcgcataacctctggcgggca  
gctgtgttcttcaagtatcttcttctgttctggtggtaccacagagagaatcctgaaggaaacacagaggcctgacctggccctcgagagactgcctga  
ctgaaggccctatcaggtgggggaggggatcctgatagagggcactgctgccactgttggggcccaag

### 6. amiR-INHBA #4

ggcagccttgagtggttctgccccctgggcacacaaacagagctgaagaccacctgggcacctccttggtggcgcataacctctggcgggca  
gctgtgtgatctccaggtctgtccatgttctggtggtaccatcgagcagtgcccgagatcacacagaggcctgacctggccctcgagagactgcctg  
actgaaggccctatcaggtgggggaggggatcctgatagagggcactgctgccactgttggggcccaag

### 7. amiR-INHBA #5

ggcagccttgagtggttctgccccctgggcacacaaacagagctgaagaccacctgggcacctccttggtggcgcataacctctggcgggca  
gctgtgtttgatgatgtttgacctgttctggtggtaccatgtgtcaattcgtcataaaacacagaggcctgacctggccctcgagagactgcctgact  
gaaggccctatcaggtgggggaggggatcctgatagagggcactgctgccactgttggggcccaag

## 8. amiR-INHBA #6

Ggcagccttgagtggttctgccccctcgggcacacaaacagagctgaagaccacctgggcacctccttggtggccgcatacctcctggcgggca  
gctgtgtcttcttcttcttctgccccctgttctggtggtacccagggcaagatcaggaagaaagacacagaggcctgctggccctcgagagactgcctga  
ctgaaggccctatcaggtggggaggggatcctgatagaggcactgctgccactgttggggcccaag

## 9. miR-122 target sequences

acaaacaccattgtcacactccaacaaacaccattgtcacactccaacaaacaccattgtcacactcca

## 10. Sequences of qPCR primers

| Gene                                  | Forward                   | Reverse                   |
|---------------------------------------|---------------------------|---------------------------|
| <i>ACVR1<sup>opt</sup></i>            | GACTACAAGCCACCCTTCTATG    | ACCAGCGATTAGGGATGTTG      |
| <i>ACVR1<sup>R206H</sup></i>          | TGGTACAAAGAACAGTGGCTTA    | CCATACCTGCCTTTCCCGA       |
| <i>Egfp</i>                           | AGCAAAGACCCCAACGAGAA      | GGCGGCGGTCACGAA           |
| Mouse <i>Inhba</i>                    | GGAGATAGAGGACGACATTGGC    | ACGCTCCACTACTGACAGGTCA    |
| Mouse <i>Sox9</i>                     | CACACGTCAAGCGACCCATGAA    | TCTTCTCGCTCTCGTTCAGCAG    |
| Mouse <i>Id1</i>                      | ACATGAACGGCTGCTACTCAC     | GACTTCAGACTCCGAGTTCAGC    |
| Mouse <i>Msx2</i>                     | GGAAGTGGAAAAGCTGAAAATG    | CACAGGTCTATGGAAGGGGTAG    |
| Mouse <i>Tnalp</i>                    | CACAATATCAAGGATATCGACGTGA | ACATCAGTTCTGTTCTTCGGGTACA |
| Mouse <i>Osx</i>                      | ATGGCGTCCTCTCTGCTTGA      | GAAGGGTGGGTAGTCATTTG      |
| Mouse <i>Bglap</i>                    | GCAGCACAGGTCCTAAATAG      | GGGCAATAAGGTAGTGAACAG     |
| Mouse <i>Ibsp</i>                     | CAGGGAGGCAGTGACTCTTC      | AGTGTGGAAAGTGTGGCGTT      |
| Mouse <i>Col1<math>\alpha</math>1</i> | ACTGTCCCAACCCCCAAAG       | ACGTATTCTTCCGGGCAGAA      |
| Mouse <i>Acht</i>                     | AGGGAAATCGTGCGTGACAT      | GGGCAATAAGGTAGTGAACAG     |
| Mouse <i>Gapdh</i>                    | ACAGTCCATGCCATCACTGCC     | GCCTGCTTCACCACCTTCTTG     |
| Human <i>INHBA</i>                    | GGATGACATTGGAAGGAGGGCA    | ACTGACAGGTCACTGCCTTCCT    |

**Figure 2A**

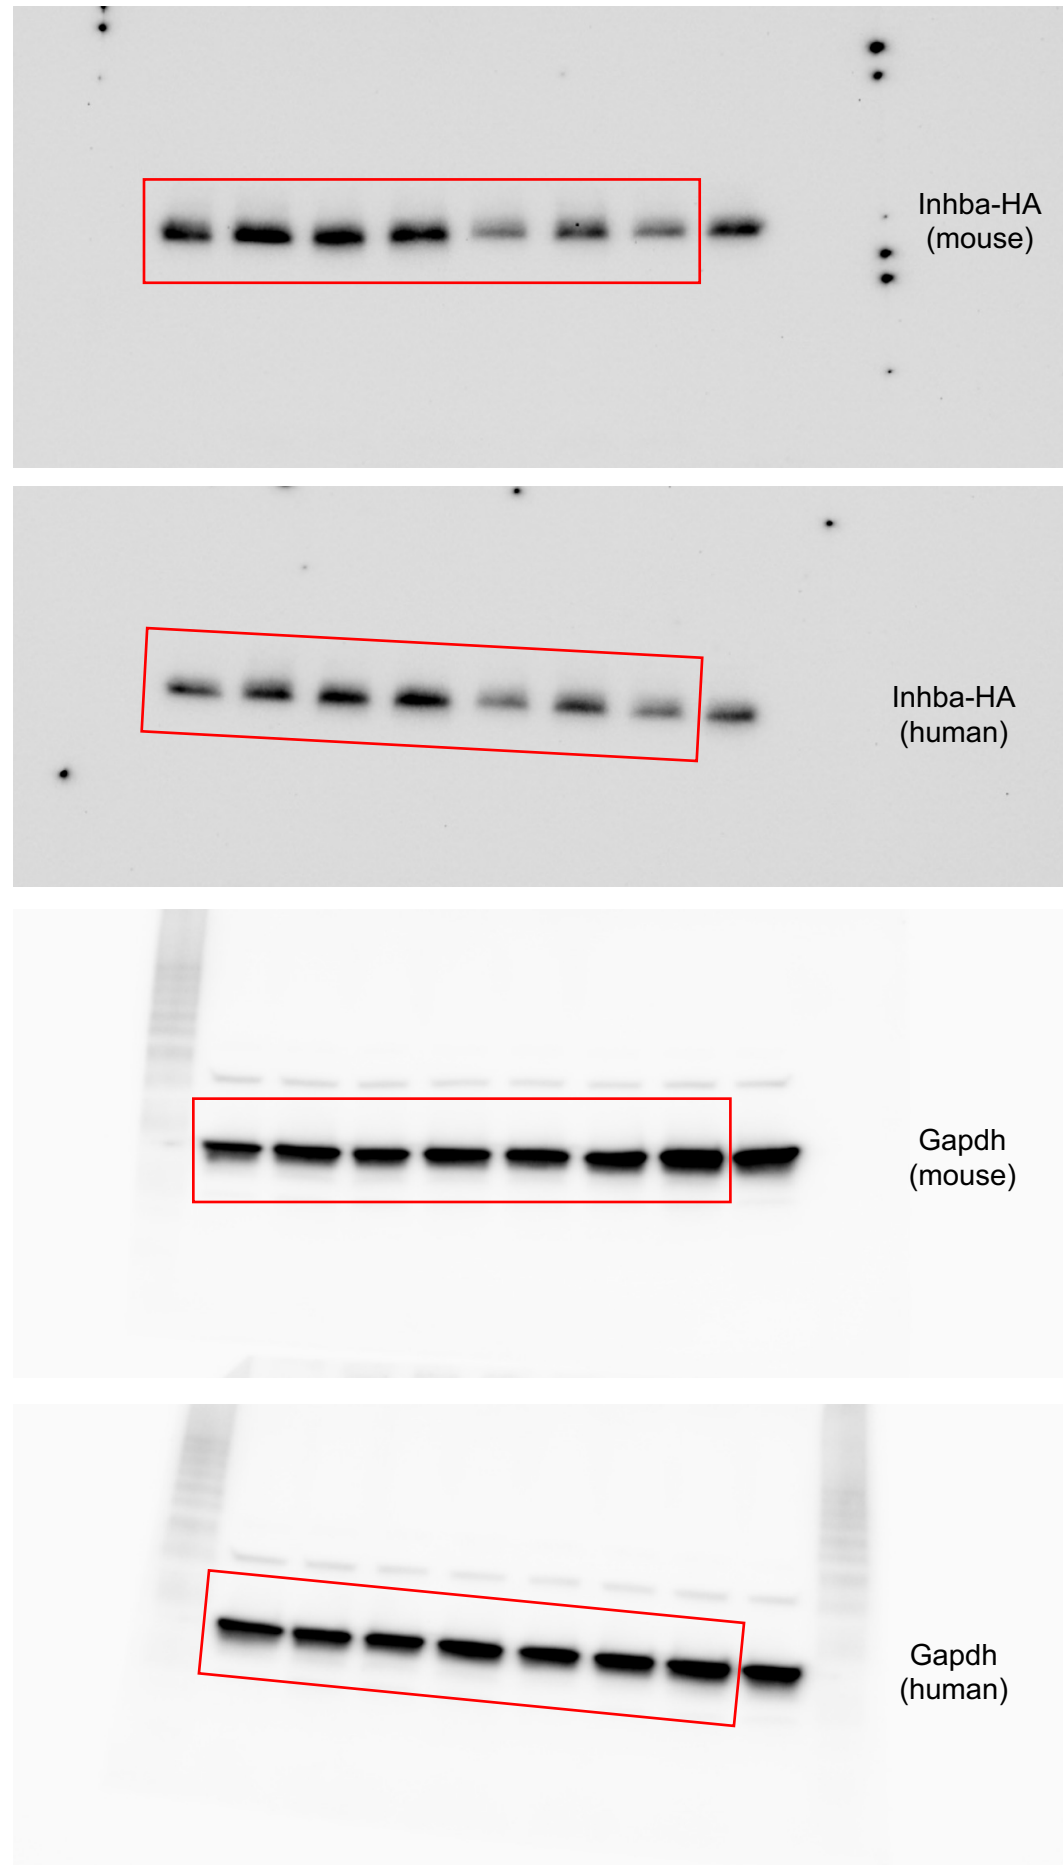

**Figure S3: Original images of Figure 2A.**

**Figure 4G**

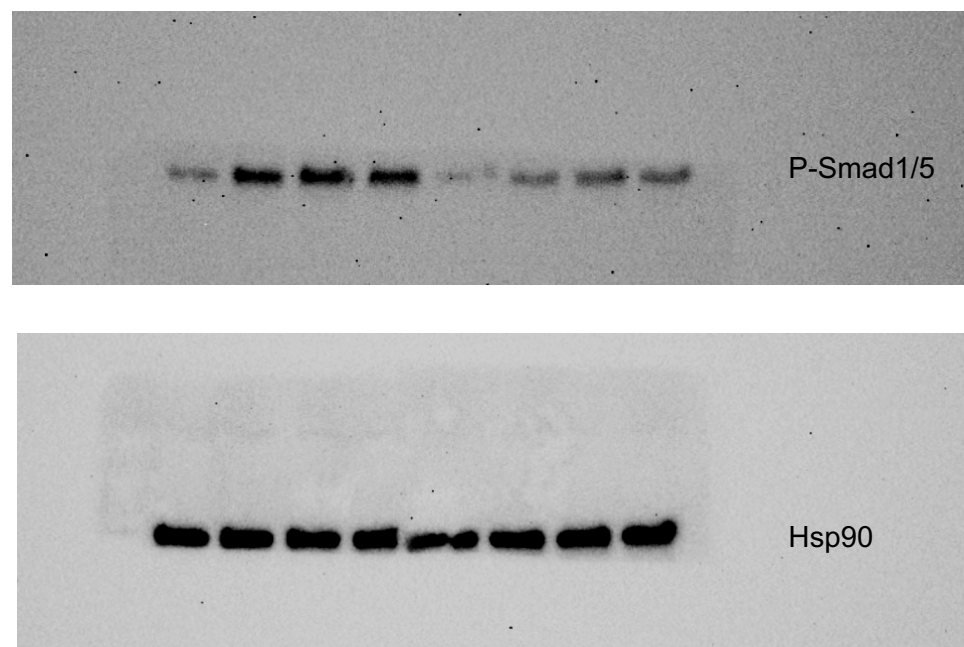

Figure S4: Original images of Figure 4G.
